# Supplementary material for: Genetic compensation prevents myopathy and heart failure in an in vivo model of Bag3 deficiency
Source: PubMed Central journal article supplement (PMC7605898; doi:10.1371/journal.pgen.1009088), 2020-11-02

# Suppl. Figure 3

A

WT heart

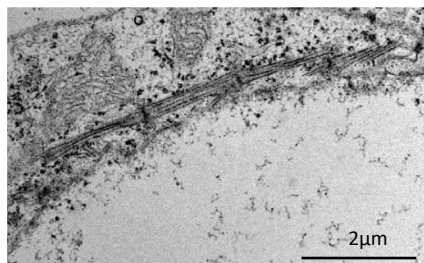

*bag3*<sup>-/-</sup> heart

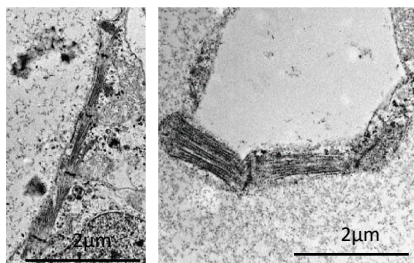

*bag3*<sup>-/-</sup> + MO-*bag2* heart

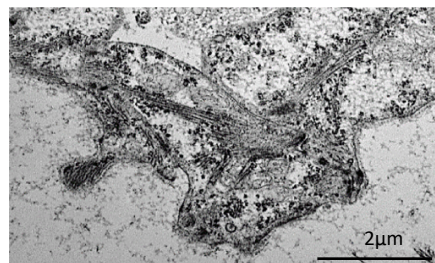

WT skm

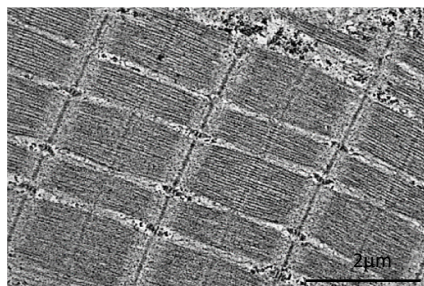

*bag3*<sup>-/-</sup> skm

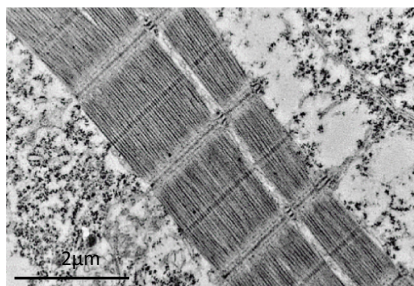

*bag3*<sup>-/-</sup> + MO-*bag2* skm

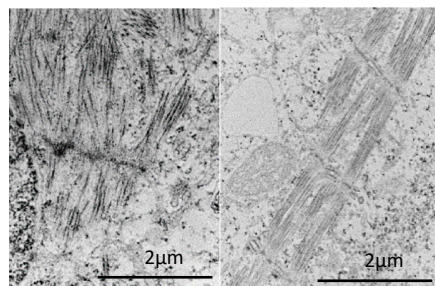

B

WT not injected

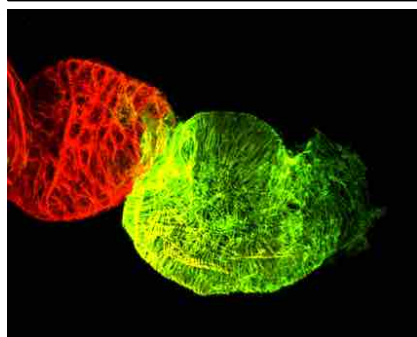

MO-*bag3* in WT

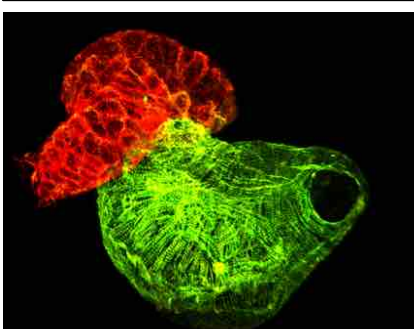

MO-*bag3* in *bag3*<sup>-/-</sup>

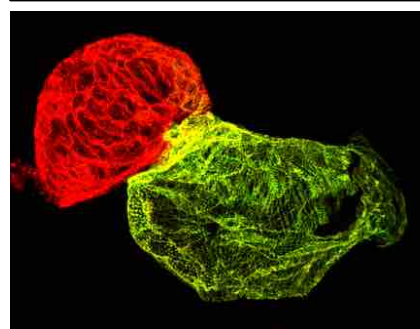

MO-*bag2* in WT

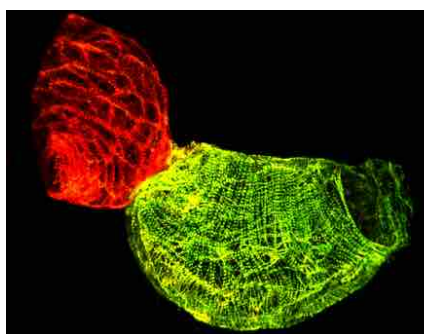

MO-*bag2* in *bag3*<sup>-/-</sup>

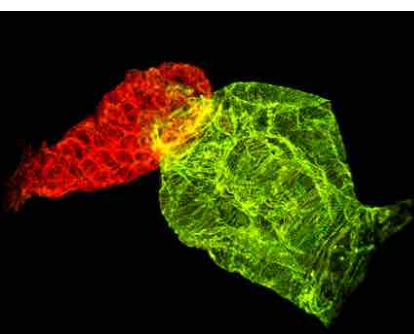

MO-*upf1* in WT

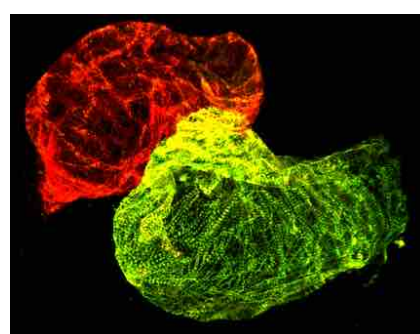

MO-*upf1* in *bag3*<sup>-/-</sup>

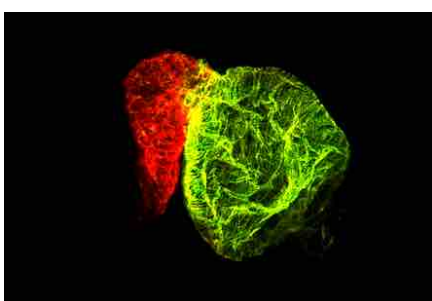

Supplement: pgen.1009088.s003.pdf [file pgen.1009088.s003.pdf]
