# Supplementary material for: Genetic compensation prevents myopathy and heart failure in an in vivo model of Bag3 deficiency
Source: PubMed Central journal article supplement (PMC7605898; doi:10.1371/journal.pgen.1009088), 2020-11-02

# Suppl. Figure 6

A

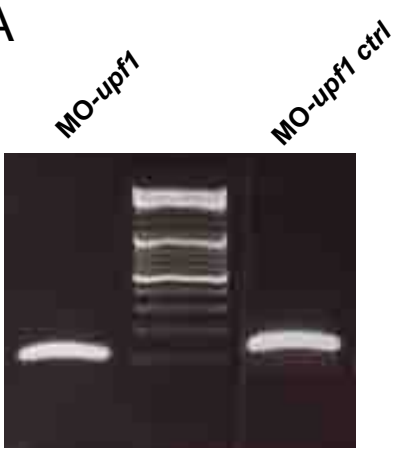

B

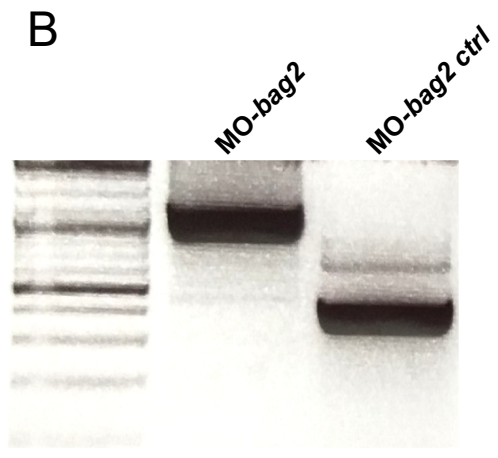

C

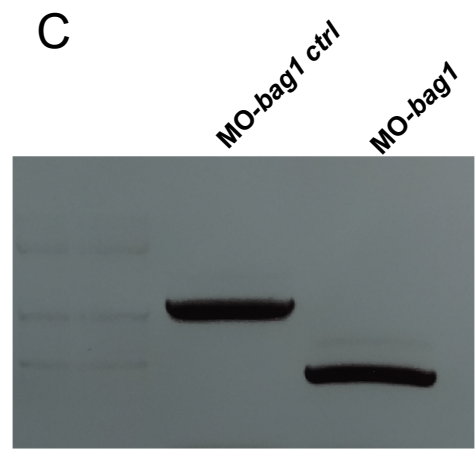

Supplement: pgen.1009088.s006.pdf [file pgen.1009088.s006.pdf]
